# Supplementary material for: Fusogenic Pairings of Vesicle-Associated Membrane Proteins (VAMPs) and Plasma Membrane t-SNAREs – VAMP5 as the Exception
Source: PubMed Central journal article supplement (PMC2997805; doi:10.1371/journal.pone.0014238), 2010-12-06

Figure S1

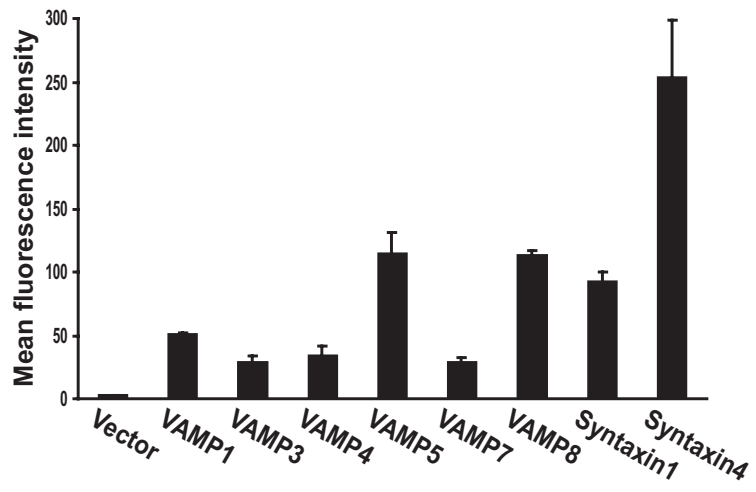

Supplement: pone.0014238.s001.pdf [file pone.0014238.s001.pdf]
